# Supplementary material for: Structural insights into the iron nitrogenase complex
Source: PubMed Central journal article supplement (PMC10803253; doi:10.1038/s41594-023-01124-2), 2023-12-07
Supplement: 41594_2023_1124_MOESM1_ESM.pdf [file 41594_2023_1124_MOESM1_ESM.pdf]

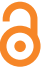

---

# Structural insights into the iron nitrogenase complex

---

In the format provided by the authors and unedited

## Supplementary Information

**Table S1: Primers used in this study.**

| Primer  | Target           | Sequence (5'-3')                                    | Purpose                    |
|---------|------------------|-----------------------------------------------------|----------------------------|
| oMM0021 | B10S genomic DNA | GCAGCGTGAAGCAGCCCGTTTCGGAATTCC<br>G                 | Construction of<br>pMM0064 |
| oMM0023 | pRhon5Hi-2       | CTGCTTCACGCTGCCGCAAG                                | Construction of<br>pMM0064 |
| oMM0027 | pBS85            | GTTTTTGGTCTCAGCCAATCCCTGGG                          | Construction of<br>pMM0021 |
| oMM0028 | pBS85            | GGCTGAGACCAAAAACATATTCTCAATAAA<br>CCC               | Construction of<br>pMM0021 |
| oMM0033 | pOGG024          | CACCACAGGTCTCGGGGTTATGCAGCGGA<br>AAAGG              | Construction of<br>pMM0002 |
| oMM0034 | pOGG024          | TCAGTAGGTCTCGAGCATGGTGAGAATCC<br>AGGGGTCC           | Construction of<br>pMM0002 |
| oMM0035 | B10S genomic DNA | TACAACAGGTCTCGTGCTCCCGAGGCGAC                       | Construction of<br>pMM0002 |
| oMM0036 | B10S genomic DNA | CATCATGGTCTCGACCGGGTAAGGAGTTC<br>CTGTC              | Construction of<br>pMM0002 |
| oMM0037 | B10S genomic DNA | CACCACAGGTCTCGACCCATTCCAAGGGC<br>CG                 | Construction of<br>pMM0002 |
| oMM0038 | B10S genomic DNA | CAATCAGGTCTCGTGGCTGCAGATCCAGT<br>CCGTA              | Construction of<br>pMM0002 |
| oMM0054 | B10S genomic DNA | CGTAGTCTGACGATGCGCACTTC                             | Construction of<br>pMM0057 |
| oMM0055 | B10S genomic DNA | GTCAAAGGAGGCAAGCCCCATCACGAG                         | Construction of<br>pMM0057 |
| oMM0056 | B10S genomic DNA | GGGCTTGCCCTCTTTGACTTGCTCGGGTT                       | Construction of<br>pMM0057 |
| oMM0057 | B10S genomic DNA | GGATCCTCTAGTGCAGAACCGAATCCGAA<br>AGC                | Construction of<br>pMM0057 |
| oMM0145 | pRhon5Hi-2       | ATCGCCGCGCAACCTGGATCCGAATTCGA<br>GCTCCGTCGACAAGCTTG | Construction of<br>pMM0064 |
| oMM0146 | B10S genomic DNA | CTCGAATTCGGATCCAGGTTGCGCGGCGA<br>TG                 | Construction of<br>pMM0064 |

|         |                  |                                                        |                                                        |
|---------|------------------|--------------------------------------------------------|--------------------------------------------------------|
| oMM0161 | pMM0064          | AAAGCGGTGTCCGAGATGACCGGCCAGC                           | Construction of pMM0073                                |
| oMM0162 | pMM0064          | CCGAGATCTTCGGGAGCGCCTGAAGC                             | Construction of pMM0073                                |
| oMM0163 | pMM0064          | CATCTCGGACACCGCTTTTCAGGAAGGC                           | Construction of pMM0073                                |
| oMM0164 | pMM0064          | CCGAAGATCTCGGGCCGTCTCTTGGGC                            | Construction of pMM0073                                |
| oMM0223 | pMM0119          | CGTTCAACCTGCCGCCGAATGGAGCCACC<br>CGCAGTTCGAAAAAT       | Construction of pMM0190                                |
| oMM0224 | pMM0119          | TTTCGCTGATATCGGTCATCTGTCCCTTATT<br>TTTCGAACTGCGGGTGGCT | Construction of pMM0190                                |
| oMM0227 | pK18mobSacB      | GATTTAGGTCTCTGTAAAACGACGGCCAGT<br>GC                   | pK18mobSacB backbone amplification for Gibson assembly |
| oMM0228 | pK18mobSacB      | GATTTAGGTCTCTCGTAATAGCGAAGAGGC<br>CCG                  | pK18mobSacB backbone amplification for Gibson assembly |
| oMM0284 | B10S genomic DNA | GATTTAGGTCTCTTTACGCGGACATCATC<br>TTCGG                 | Construction of pMM0105                                |
| oMM0286 | B10S genomic DNA | GATTTAGGTCTCAGAGATCCGCGCTCAGG<br>TGC                   | Construction of pMM0105                                |
| oMM0287 | B10S genomic DNA | GATTTAGGTCTCTTACGAACGAATATCTGG<br>CGGCGG               | Construction of pMM0105                                |
| oMM0288 | B10S genomic DNA | GATTTAGGTCTCTTCTCCAGATTGGTGGAA<br>TGGCCAAGG            | Construction of pMM0105                                |
| oMM0323 | B10S genomic DNA | ATGCAAGCTTGGCACTGGCCGTCGTTTTAC<br>GGTCTCGCAGCGGTC      | Construction of pMM0133                                |
| oMM0324 | B10S genomic DNA | CCCTAGCCCCCCTGGAGACGAACACGCG<br>CGA                    | Construction of pMM0133                                |
| oMM0325 | B10S genomic DNA | GCGCGTGTTTCGTCTCCAGGGGGGGCTAG<br>GGTG                  | Construction of pMM0133                                |

|         |                  |                                                        |                            |
|---------|------------------|--------------------------------------------------------|----------------------------|
| oMM0326 | B10S genomic DNA | GCGATCGGTGCGGGCCTCTTCGCTATTAC<br>GCTCGGGTTTTTCGGTGGTGG | Construction of<br>pMM0133 |
| oMM0384 | pRhon5Hi-2       | GCCGTGGGTCGATGTTTGATGTTAGTCTTA<br>TCTGAAAGTTGTGC       | Construction of<br>pMM0119 |
| oMM0385 | pRhon5Hi-2       | CGATCTCGGCTTGAACGAATTGACCTTTTC<br>TCCGACGAATAGAGT      | Construction of<br>pMM0119 |
| oMM0386 | pOGG024          | AATTCGTTCAAGCCGAGATCG                                  | Construction of<br>pMM0119 |
| oMM0387 | pOGG024          | TAACATCAAACATCGACCCACG                                 | Construction of<br>pMM0119 |
| oMM0389 | pMM0073          | GATTTAGGTCTCAGGAGCAGCCCGTTCCGG<br>AATTCC               | Construction of<br>pMM0119 |
| oMM0390 | pMM0073          | GATTTAGGTCTCTAGCGGGTCACCACACGT<br>TGAGG                | Construction of<br>pMM0119 |
| oMM0394 | B10S genomic DNA | GATTTAGGTCTCTCTGGTCAAGATCCTCGA<br>CGC                  | Construction of<br>pMM0131 |
| oMM0395 | B10S genomic DNA | GATTTAGGTCTCTCCAGCGACTTGCCGATA<br>CCACCTTTG            | Construction of<br>pMM0131 |
| oMM0396 | B10S genomic DNA | GATTTAGGTCTCAGGAGATCCCGATCCCGT<br>TCGAATG              | Construction of<br>pMM0131 |
| oMM0397 | B10S genomic DNA | CAAATCGACGACCACCATGGCCAACACGC<br>TTTTTCG               | Construction of<br>pMM0131 |
| oMM0510 | pMM0119          | CCTTCCAAGGAGCGACCCATGCACCACC<br>ATCATCACCATA           | Construction of<br>pMM0190 |
| oMM0511 | pMM0119          | CCGTAAATGGCGATCTTGCGGGTATGGTG<br>ATGATGGTGGTGC         | Construction of<br>pMM0190 |

**Table S2: Plasmids used in this study.**

| Plasmid                                          | Code    | Relevant Features                                                                                                                                              | Source or Reference     |
|--------------------------------------------------|---------|----------------------------------------------------------------------------------------------------------------------------------------------------------------|-------------------------|
| pK18mobSacB                                      | pMM0056 | Suicide vector, <i>oriT</i> (mobilizable), <i>sacB</i> , Kan <sup>R</sup>                                                                                      | [1]                     |
| pK18mobSacB- <i>draTG</i>                        | pMM0105 | Suicide vector, <i>oriT</i> (mobilizable), <i>sacB</i> , Kan <sup>R</sup> , homologous recombination sites for <i>draTG</i> locus                              | This study              |
| pK18mobSacB- <i>gtal</i>                         | pMM0133 | Suicide vector, <i>oriT</i> (mobilizable), <i>sacB</i> , Kan <sup>R</sup> , homologous recombination sites for <i>gtal</i> locus                               | This study              |
| pK18mobSacB- <i>nifHDK</i>                       | pMM0131 | Suicide vector, <i>oriT</i> (mobilizable), <i>sacB</i> , Kan <sup>R</sup> , homologous recombination sites for <i>nifHDK</i> locus                             | This study              |
| pK18mobSacB- <i>modABC</i>                       | pMM0057 | Suicide vector, <i>oriT</i> (mobilizable), <i>sacB</i> , Kan <sup>R</sup> , homologous recombination sites for <i>modABC</i> locus                             | This study              |
| pBS85                                            | pMM0017 | Suicide vector, <i>oriT</i> (mobilizable), Tet <sup>R</sup>                                                                                                    | [2]                     |
| pBS85-Bsal                                       | pMM0021 | Suicide vector, <i>oriT</i> (mobilizable), Tet <sup>R</sup> , Bsal cutting site                                                                                | This study              |
| pBS85-Bsal- <i>genR</i>                          | pMM0002 | Suicide vector, <i>oriT</i> (mobilizable), Tet <sup>R</sup> , Bsal cutting site, Gen <sup>R</sup> , homologous recombination sites for <i>anfHDGK</i> locus    | This study              |
| pRhon5Hi-2                                       | pMM0031 | Broad host range plasmid, Kan <sup>R</sup>                                                                                                                     | [3]                     |
| pRhon5Hi-2- <i>anfHDGK</i>                       | pMM0064 | Broad host range plasmid, <i>anfHDGK</i> operon, Kan <sup>R</sup>                                                                                              | This study              |
| pRhon5Hi-2- <i>anfHDGK</i> -Golden Gate          | pMM0073 | Broad host range plasmid, <i>anfHDGK</i> operon with silent mutation in Bsal cutting site, Kan <sup>R</sup>                                                    | This study              |
| pOGG024                                          | pMM0114 | Broad host range plasmid, <i>oriT</i> (mobilizable), <i>lacZα</i> cassette for golden gate cloning (Bsal), Gen <sup>R</sup>                                    | Addgene plasmid #113991 |
| pOGG024- <i>kanR</i>                             | pMM0119 | Broad host range plasmid, <i>oriT</i> (mobilizable), <i>lacZα</i> cassette for golden gate cloning (Bsal), Kan <sup>R</sup>                                    | This study              |
| pOGG024- <i>kanR</i> - <i>anfHDGK</i>            | pMM0119 | Broad host range plasmid, <i>oriT</i> (mobilizable), <i>anfHDGK</i> operon, Kan <sup>R</sup>                                                                   | This study              |
| pOGG024- <i>kanR</i> - <i>anfHDGK</i> -Strep/His | pMM0190 | Broad host range plasmid, <i>oriT</i> (mobilizable), <i>anfHDGK</i> operon with N-terminal His <sub>6</sub> -tag and C-terminal Strep tag II, Kan <sup>R</sup> | This study              |

**Table S3: Strains used in this study.**

| Strain                                                   | Genotype                                                                                                                                                                                                          | Source or Reference                                                    |
|----------------------------------------------------------|-------------------------------------------------------------------------------------------------------------------------------------------------------------------------------------------------------------------|------------------------------------------------------------------------|
| <i>Rhodobacter capsulatus</i> B10S                       | Wildtype                                                                                                                                                                                                          | [4]                                                                    |
| <i>Rhodobacter capsulatus</i> MM0425                     | $\DeltaanfHDGK::genR \Delta modABC \Delta draTG \Delta gtaI \Delta nifHDK$                                                                                                                                        | This study                                                             |
| <i>Rhodobacter capsulatus</i> MM0436 (expression strain) | $\DeltaanfHDGK::genR \Delta modABC \Delta draTG \Delta gtaI \Delta nifHDK$                                                                                                                                        | This study                                                             |
| <i>Escherichia coli</i> DH5 $\alpha$                     | F <sup>-</sup> $\Phi80lacZ\Delta M15 \Delta(lacZYA-argF)$ U169<br><i>recA1 endA1 hsdR17(r<sub>k</sub><sup>-</sup>, m<sub>k</sub><sup>+</sup>) phoA supE44 thi-1 gyrA96 relA1 <math>\lambda</math><sup>-</sup></i> | Thermo Scientific (Waltham, USA) Fisher Inc. (USA) catalogue #18265017 |
| <i>Escherichia coli</i> ST18                             | RP4-2 <i>Tc::Mu Km::Tn7 <math>\Delta hemA</math></i> mutant                                                                                                                                                       | [5]                                                                    |

## SI References

1. Schäfer, A., et al., *Small mobilizable multi-purpose cloning vectors derived from the Escherichia coli plasmids pK18 and pK19: selection of defined deletions in the chromosome of Corynebacterium glutamicum*. Gene, 1994. **145**(1): p. 69-73.
2. Hoffmann, M.C., et al., *Coordinated expression of fdxD and molybdenum nitrogenase genes promotes nitrogen fixation by Rhodobacter capsulatus in the presence of oxygen*. Journal of Bacteriology, 2014. **196**(3): p. 633-40.
3. Troost, K., et al., *Engineered Rhodobacter capsulatus as a Phototrophic Platform Organism for the Synthesis of Plant Sesquiterpenoids*. Frontiers in Microbiology, 2019. **10**: p. 1998.
4. Klipp, W., B. Masepohl, and A. Pühler, *Identification and mapping of nitrogen fixation genes of Rhodobacter capsulatus: duplication of a nifA-nifB region*. Journal of Bacteriology, 1988. **170**(2): p. 693-699.
5. Thoma, S. and M. Schobert, *An improved Escherichia coli donor strain for diparental mating*. FEMS Microbiology Letters, 2009. **294**(2): p. 127-132.
